# Supplementary material for: Visible-light photocatalysis in Cu2Se nanowires with exposed {111} facets and charge separation between (111) and (111) polar surfaces
Source: Royal Society of Chemistry journal article supplement (doi:10.1039/c5cp00450k), 2015-01-01
Supplement: c5cp00450k1.pdf [file c5cp00450k1.pdf]

## Supporting Information

### **Visible-light photocatalysis in Cu<sub>2</sub>Se nanowires with exposed {111} facets and charge separation between (111) and $\bar{1}\bar{1}\bar{1}$ polar surfaces**

Bin Liu<sup>1</sup>, Lichao Ning<sup>2</sup>, Hua Zhao<sup>1</sup>, Congjie Zhang<sup>2</sup>, Heqing Yang<sup>1,\*</sup> and Shengzhong (Frank) Liu<sup>3</sup>

*1. Key Laboratory of Macromolecular Science of Shaanxi Province, School of Materials Science and Engineering, Shaanxi Normal University, Xi'an, 710119, China. Email: hqyang@snnu.edu.cn, Tel: +86 029 81530710 (L)* *2. Key Laboratory of Macromolecular Science of Shaanxi Province, School of Chemistry and Chemical Engineering, Shaanxi Normal University, Xi'an, 710119, China.* *3. Key Laboratory of Applied Surface and Colloid Chemistry, National Ministry of Education, School of Materials Science and Engineering, Shaanxi Normal University, Xi'an 710119, China*

**Preparation of Cu<sub>2</sub>Se powders.** 0.100 g Cu(Ac)<sub>2</sub>·H<sub>2</sub>O (0.5 mmol), 0.039 g of Se powder (0.5 mmol), 1.200 g NaOH, 15.0 mL of H<sub>2</sub>O and 10.0 mL of glycerol were added in order into a Teflon-lined autoclave of 50 mL capacity, After the mixture was stirred for 30 min, the autoclave was sealed and heated at 200 °C for 12 h. After the heating treatment, the autoclave was cooled to room temperature naturally. The products were collected by centrifugation, washed three times with de-ionized water and absolute ethanol, respectively. Finally, the product was dried under vacuum and stored in a vacuum desiccator.

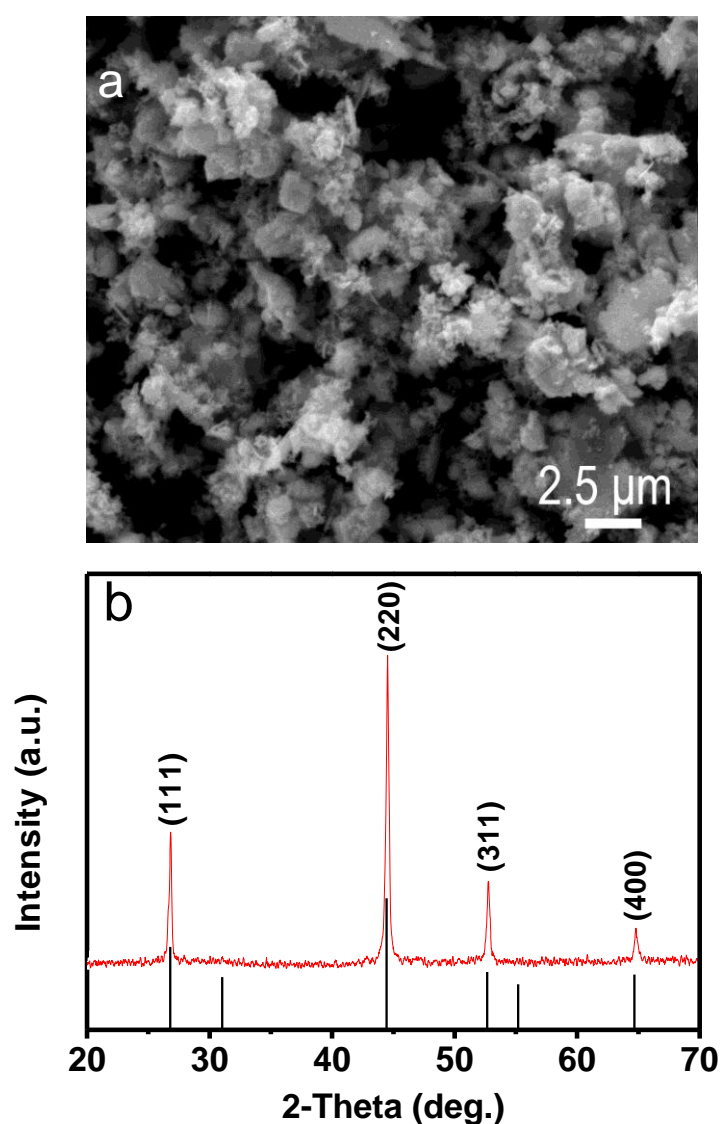

**Fig. S1.** SEM image and XRD pattern of Cu<sub>2</sub>Se powders.

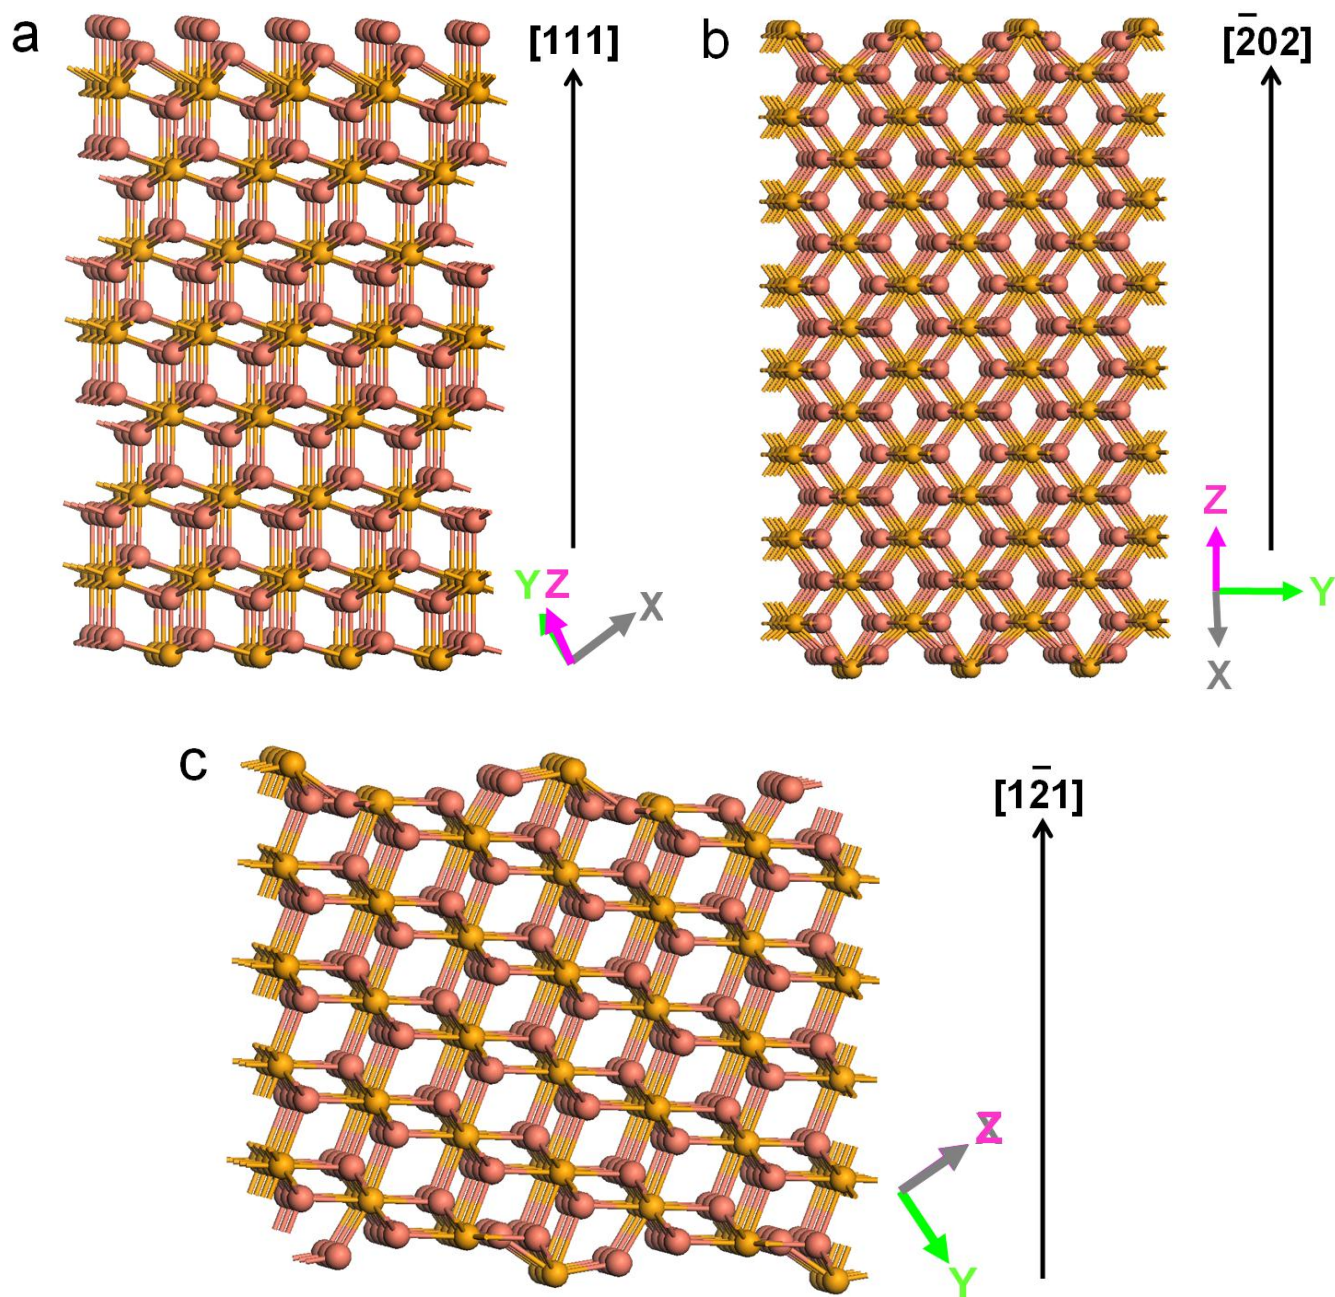

**Fig. S2.** Relaxed geometries for the  $(111)$ ,  $(\bar{2}02)$  and  $(\bar{1}2\bar{1})$  surfaces of  $\text{Cu}_2\text{Se}$ .

**Table S1.** The surface energies of (111), ( $\bar{1}21$ ) and ( $\bar{2}02$ ) faces of Cu<sub>2</sub>Se.

| (111)<br>(J/m <sup>2</sup> ) | (1-21)<br>(J/m <sup>2</sup> ) | (-202)<br>(J/m <sup>2</sup> ) |
|------------------------------|-------------------------------|-------------------------------|
| 1.00                         | 0.39                          | 0.26                          |

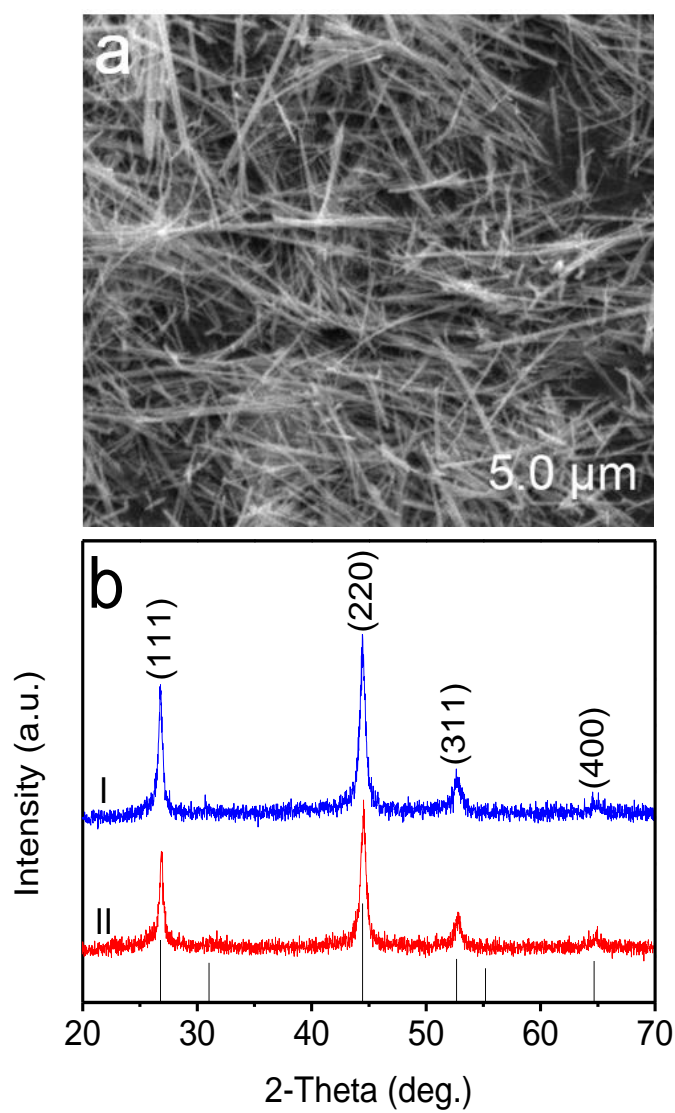

**Fig. S3.** (a) SEM image of the sample 3 after four cycles. (b) XRD pattern of the sample 3 before (I) and after (II) four cycles.
